# Supplementary material for: Ca2+ Cycling Impairment in Heart Failure Is Exacerbated by Fibrosis: Insights Gained From Mechanistic Simulations
Source: PubMed Central journal article supplement (PMC6116328; doi:10.3389/fphys.2018.01194), 2018-08-23
Supplement: Data_Sheet_1.pdf [file Data_Sheet_1.pdf]

## *Supplementary Material*

# **Ca<sup>2+</sup> Cycling Impairment in Heart Failure is Exacerbated by Fibrosis: Insights Gained from Mechanistic Simulations**

**Maria T Mora, Jose M Ferrero, Juan F Gomez, Eric A Sobie, Beatriz Trenor\***

\* **Correspondence:** Beatriz Trenor: btrenor@eln.upv.es

In the following tables we provide the required information to replicate our simulations:

**Supplementary Table 1.** Changes in ORd model leading to ORdmm

| Ion current | New formulation                                           | References                                                           |
|-------------|-----------------------------------------------------------|----------------------------------------------------------------------|
|             | $G_{Na} = 31 \text{ mS}/\mu\text{F}$                      |                                                                      |
|             | $h_{ss} = j_{ss} = \frac{1}{1 + e^{\frac{V+78.5}{6.22}}}$ |                                                                      |
| $I_{Na}$    | $h_{ssp} = \frac{1}{1 + e^{\frac{V+84.7}{6.22}}}$         | (Mora et al., 2017; Passini et al., 2016; ten Tusscher et al., 2004) |
|             | $m_{ss} = \frac{1}{1 + e^{\frac{V+48.97}{7.5}}}$          |                                                                      |
| $I_{NaL}$   | $G_{NaL} = 0.0144 \text{ mS}/\mu\text{F}$                 | (Maltsev and Undrovinas, 2006; Mora et al., 2017)                    |

$G_{Na}$  and  $G_{NaL}$  are maximal conductances of fast ( $I_{Na}$ ) and late  $Na^+$  currents ( $I_{NaL}$ ),  $V$  is membrane potential and  $h_{ss}$ ,  $j_{ss}$ ,  $h_{ssp}$  and  $m_{ss}$  are steady-state inactivation and activation gates of  $I_{Na}$ .

**Supplementary Table 2.** Heart failure (HF) remodeling in ORdmm model.

| <b>Ionic parameter</b> | <b>% of change compared to the ORdmm</b> | <b>Experimental references</b>                                               |
|------------------------|------------------------------------------|------------------------------------------------------------------------------|
| $I_{NaL}$              | 180 %                                    | (Maltsev et al., 2007)                                                       |
| $\tau_{hL}$            | 180 %                                    | (Maltsev et al., 2007)                                                       |
| $I_{to}$               | 40 %                                     | (Beuckelmann et al., 1993)                                                   |
| $I_{K1}$               | 68 %                                     | (Tomaselli and Marban, 1999)                                                |
| $I_{NaK}$              | 70 %                                     | (Bundgaard and Kjeldsen, 1996; Tomaselli, 2004; Tomaselli and Marban, 1999) |
| $I_{NCX}$              | 175 %                                    | (Winslow et al., 1999)                                                       |
| CaMKa                  | 150 %                                    | (Antoons et al., 2007; Sossalla et al., 2011)                                |
| $J_{SERCA}$            | 50 %                                     | (Piacentino et al., 2003)                                                    |
| $J_{leak}$             | 130 %                                    | (Bers et al., 2006)                                                          |
| $K_{rel,Ca}$           | 80 %                                     | (George, 2007)                                                               |

The modified parameters are the maximum values of the late  $Na^+$  current ( $I_{NaL}$ ), the time constant of inactivation of the  $I_{NaL}$  ( $\tau_{hL}$ ), the transient outward current ( $I_{to}$ ), the inward rectifier  $K^+$  current ( $I_{K1}$ ), the  $Na^+/K^+$  pump current ( $I_{NaK}$ ), the  $Na^+/Ca^{2+}$  exchanger ( $I_{NCX}$ ), the fraction of active binding sites of the  $Ca^{+2}$  calmodulin-dependent protein kinase II (CaMKa), the sarcoplasmic reticulum (SR)  $Ca^{2+}$  pump ( $J_{SERCA}$ ), the SR  $Ca^{2+}$  leak ( $J_{leak}$ ) and the sensitivity to  $[Ca^{2+}]_{JSR}$  of the ryanodine receptors ( $Ca^{2+}$  sensitivity of  $J_{rel,\infty}$ , called  $K_{rel,Ca}$ ).

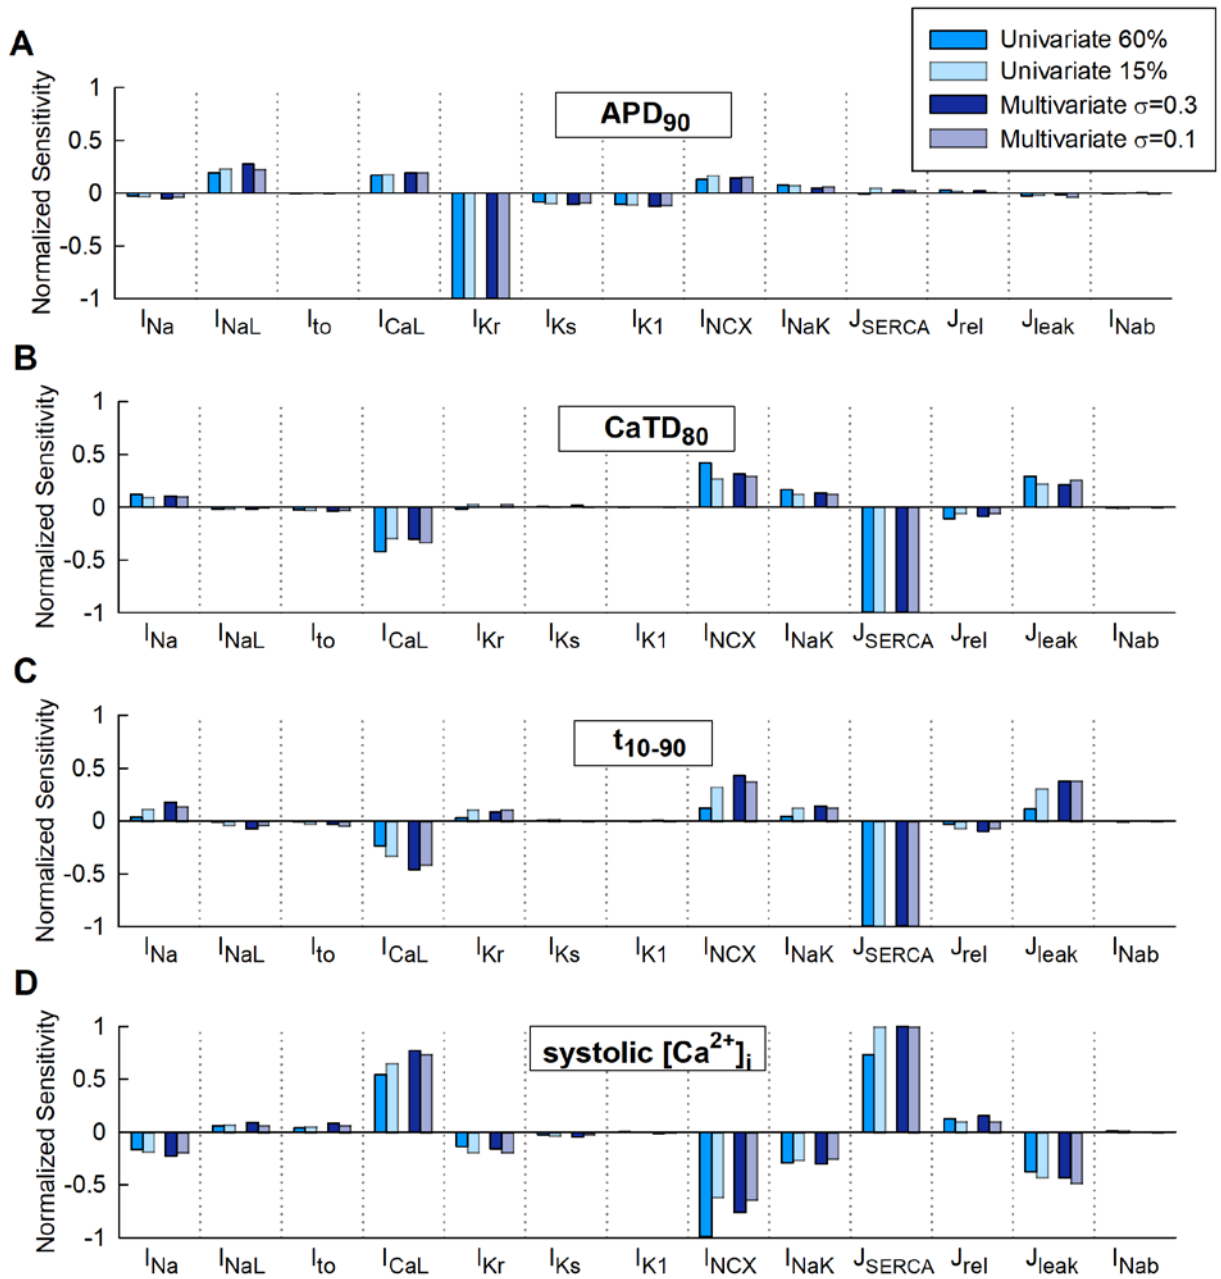

**Supplementary Figure 1.** Univariate and multivariate sensitivities in normal conditions with high and low parameter variability. Modulators of A) action potential duration to 90% of repolarization ( $APD_{90}$ ), B)  $Ca^{2+}$  transient (CaT) duration to 80% of recovery ( $CaTD_{80}$ ), C) CaT rise time ( $t_{10-90}$ ) and, D) Systolic peak of CaT.

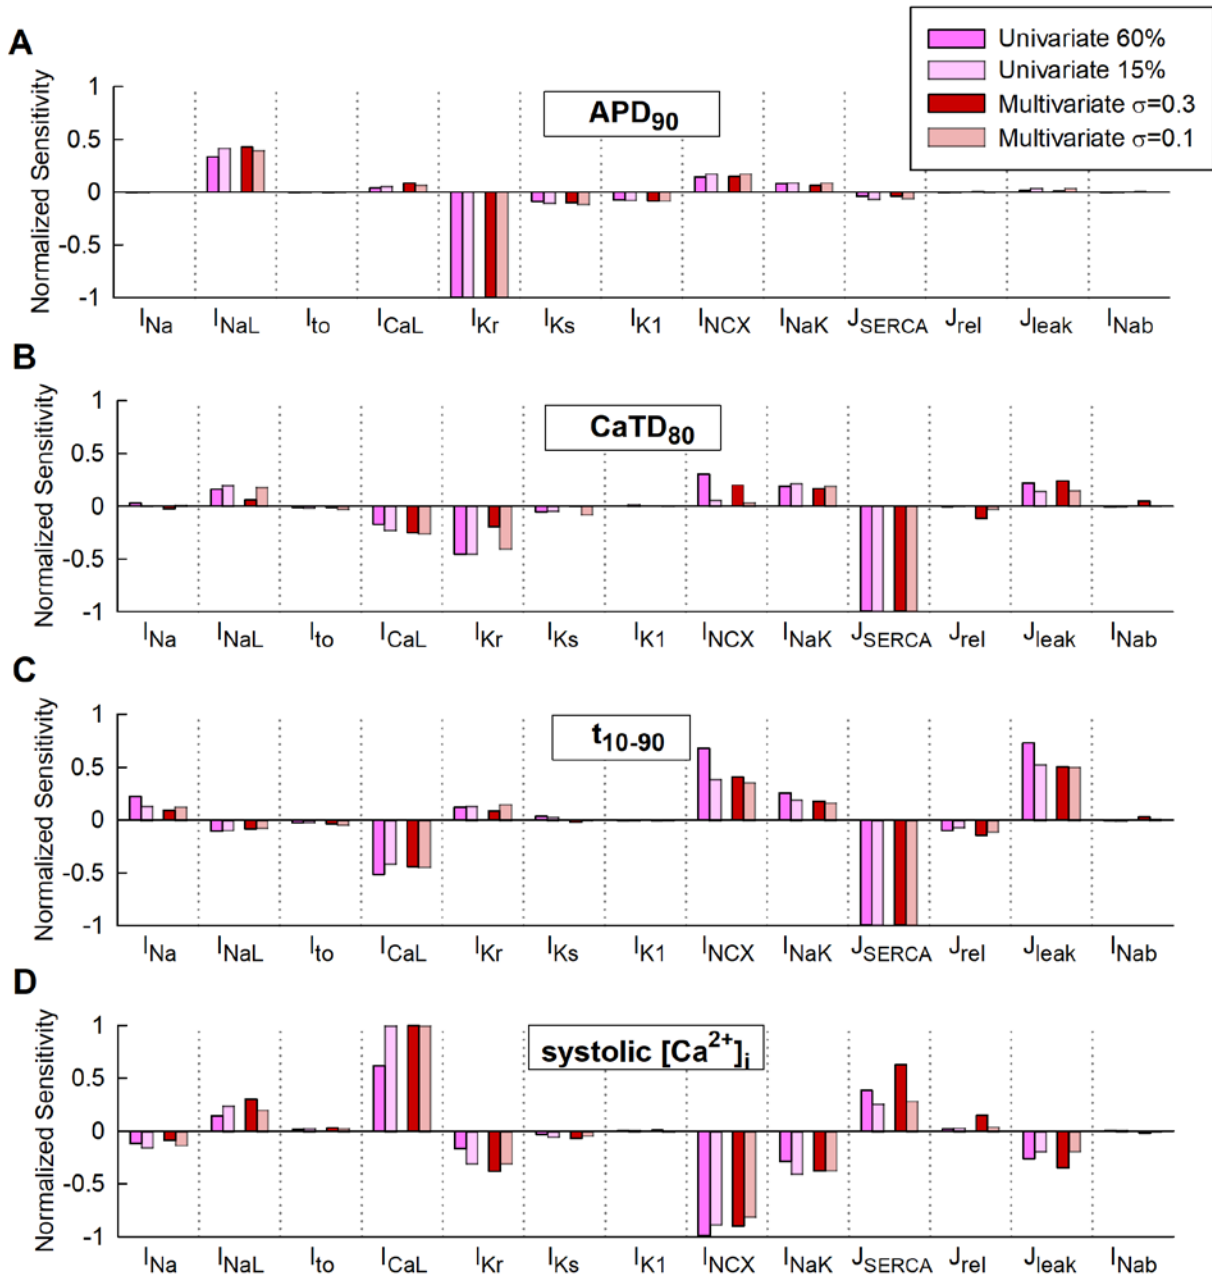

**Supplementary Figure 2.** Univariate and multivariate sensitivities in heart failure with high and low parameter variability. Modulators of A) action potential duration to 90% of repolarization (APD<sub>90</sub>), B) Ca<sup>2+</sup> transient (CaT) duration to 80% of recovery (CaTD<sub>80</sub>), C) CaT rise time (t<sub>10-90</sub>) and, D) Systolic peak of CaT.

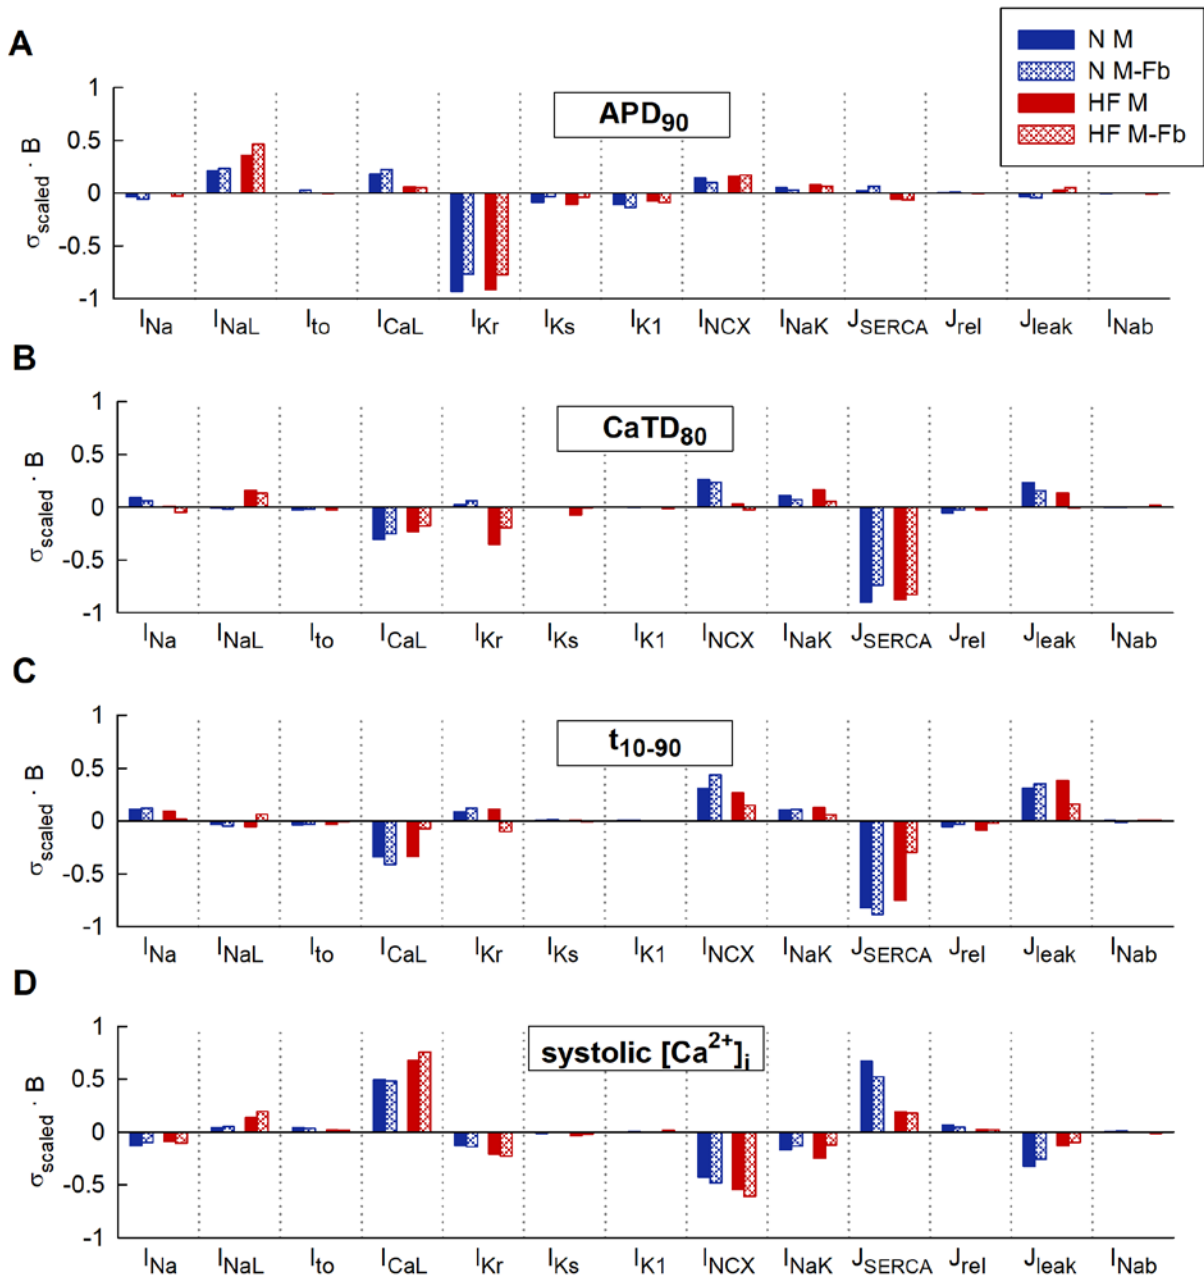

**Supplementary Figure 3.** Comparison of sensitivities obtained from 4 multivariable regression analyses: normal (N) and heart failure (HF) conditions with or without coupled fibroblasts (Fb). Modulators of A) action potential duration to 90% of repolarization (APD<sub>90</sub>), B) Ca<sup>2+</sup> transient (CaT) duration to 80% of recovery (CaTD<sub>80</sub>), C) CaT rise time (t<sub>10-90</sub>) and, D) Systolic peak of CaT. Low parameter variability ( $\sigma=0.1$ ). Regression coefficients (B) are scaled to the standard deviation ( $\sigma$ ) of log-normal distributed biomarkers in uncoupled myocytes (M).

N

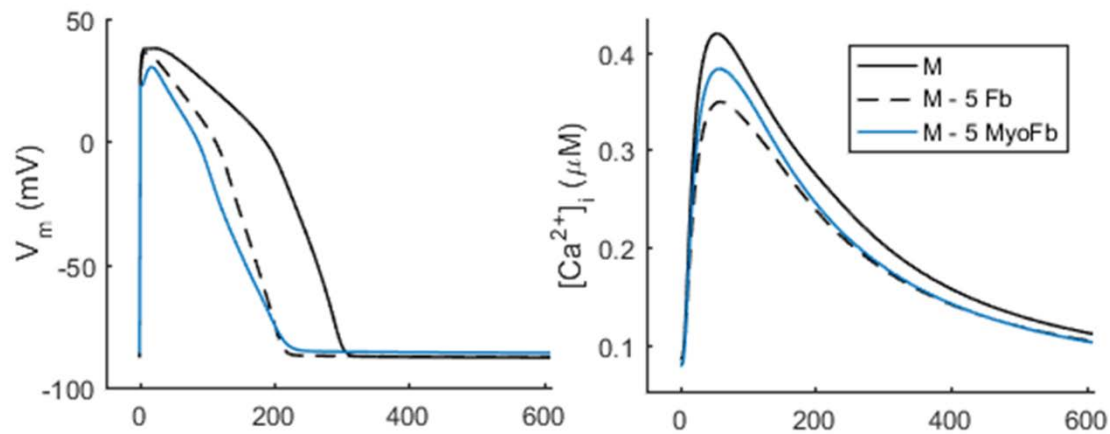

HF

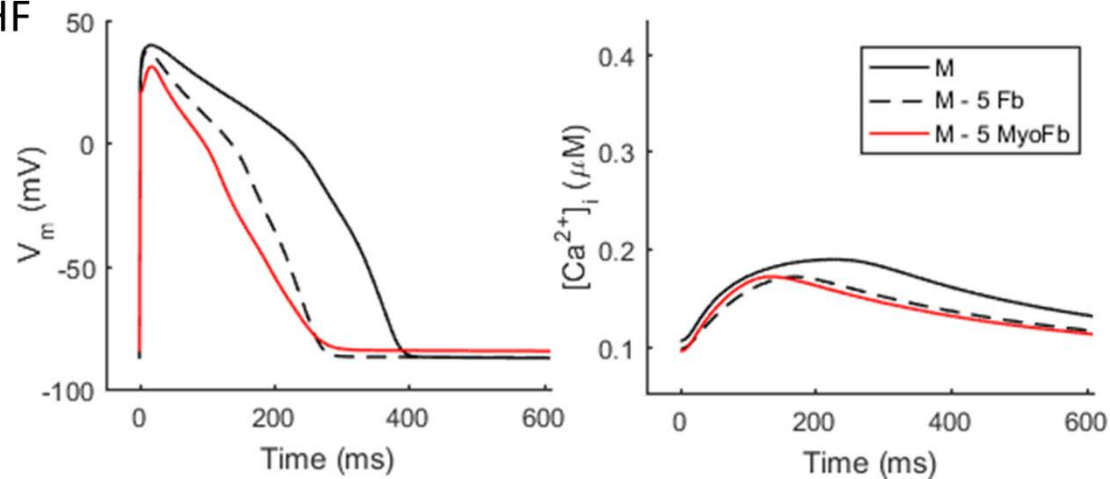

**Supplementary Figure 4.** Comparison of the effects of coupling fibroblasts (Fb) and myofibroblasts (MyoFb) on action potential and  $Ca^{2+}$  transient of a myocyte (M) in normal (N) and heart failure (HF) conditions. For myofibroblast simulations, MacCannell et al. (2007) active model was modified, increasing  $C_m$  to 50 pF and depolarizing the resting membrane potential of the fibroblast to -24.5 mV.

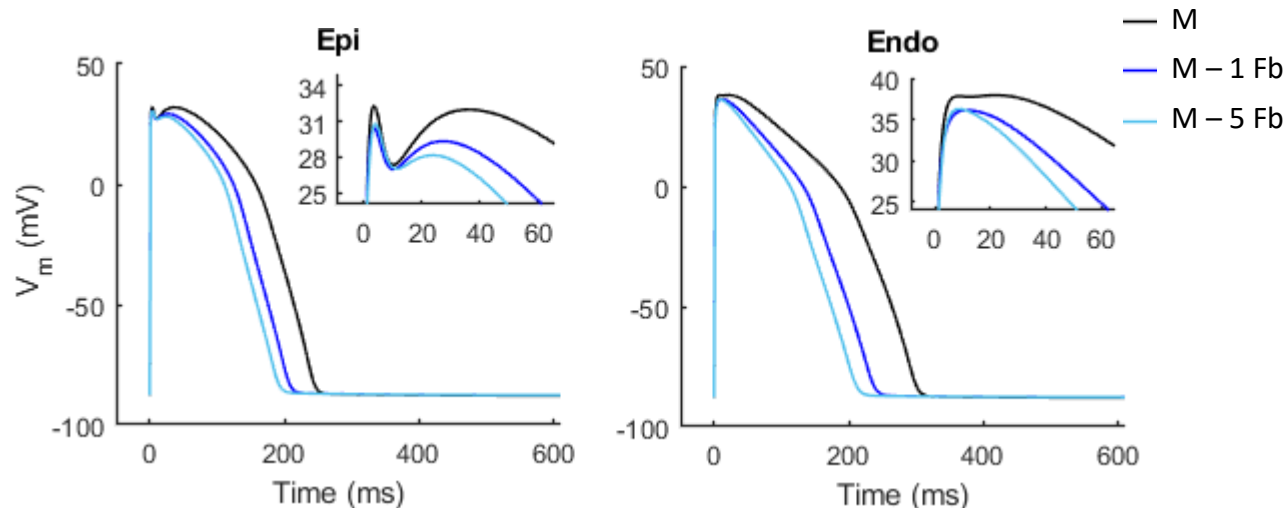

**Supplementary Figure 5.** Comparison of the effects of coupling fibroblasts (Fb) to epicardial and endocardial cells (M) on action potential waveform. Insets show phase 1 with higher resolution. The number of coupled fibroblasts is 0 (M), 1 and 5.

## REFERENCES

- Antoons, G., Oros, A., Bito, V., Sipido, K. R., and Vos, M. A. (2007). Cellular basis for triggered ventricular arrhythmias that occur in the setting of compensated hypertrophy and heart failure: considerations for diagnosis and treatment. *J. Electrocardiol.* 40, S8–S14. doi:10.1016/j.jelectrocard.2007.05.022.
- Bers, D. M., Despa, S., and Bossuyt, J. (2006). Regulation of Ca<sup>2+</sup> and Na<sup>+</sup> in Normal and Failing Cardiac Myocytes. *Ann. N. Y. Acad. Sci.* 1080, 165–177. doi:10.1196/annals.1380.015.
- Beuckelmann, D. J., Nabauer, M., and Erdmann, E. (1993). Alterations of K<sup>+</sup> currents in isolated human ventricular myocytes from patients with terminal heart failure. *Circ. Res.* 73, 379–385. doi:10.1161/01.RES.73.2.379.
- Bundgaard, H., and Kjeldsen, K. (1996). Human myocardial Na,K-ATPase concentration in heart failure. *Mol. Cell. Biochem.* 163–164, 277–283. doi:10.1007/BF00408668.
- George, C. H. (2007). Sarcoplasmic reticulum Ca<sup>2+</sup> leak in heart failure: mere observation or functional relevance? *Cardiovasc. Res.* 77, 302–314. doi:10.1093/cvr/cvm006.
- MacCannell, K. A., Bazzazi, H., Chilton, L., Shibukawa, Y., Clark, R. B., and Giles, W. R. (2007). A mathematical model of electrotonic interactions between ventricular myocytes and fibroblasts. *Biophys. J.* 92, 4121–4132. doi:10.1529/biophysj.106.101410.
- Maltsev, V. A., Silverman, N., Sabbah, H. N., and Undrovinas, A. I. (2007). Chronic heart failure slows late sodium current in human and canine ventricular myocytes: Implications for repolarization variability. *Eur. J. Heart Fail.* 9, 219–227. doi:10.1016/j.ejheart.2006.08.007.

- Maltsev, V. A., and Undrovinas, A. I. (2006). A multi-modal composition of the late Na<sup>+</sup> current in human ventricular cardiomyocytes. *Cardiovasc. Res.* 69, 116–127. doi:10.1016/j.cardiores.2005.08.015.
- Mora, M. T., Ferrero, J. M., Romero, L., and Trenor, B. (2017). Sensitivity analysis revealing the effect of modulating ionic mechanisms on calcium dynamics in simulated human heart failure. *PLoS One* 12, e0187739. doi:10.1371/journal.pone.0187739.
- Passini, E., Mincholé, A., Coppini, R., Cerbai, E., Rodriguez, B., Severi, S., et al. (2016). Mechanisms of pro-arrhythmic abnormalities in ventricular repolarisation and anti-arrhythmic therapies in human hypertrophic cardiomyopathy. *J. Mol. Cell. Cardiol.* 96, 72–81. doi:10.1016/j.yjmcc.2015.09.003.
- Piacentino, V., Weber, C. R., Chen, X., Weisser-Thomas, J., Margulies, K. B., Bers, D. M., et al. (2003). Cellular basis of abnormal calcium transients of failing human ventricular myocytes. *Circ. Res.* 92, 651–658. doi:10.1161/01.RES.0000062469.83985.9B.
- Sossalla, S., Maurer, U., Schotola, H., Hartmann, N., Didié, M., Zimmermann, W.-H., et al. (2011). Diastolic dysfunction and arrhythmias caused by overexpression of CaMKII $\delta$ C can be reversed by inhibition of late Na<sup>+</sup> current. *Basic Res. Cardiol.* 106, 263–272. doi:10.1007/s00395-010-0136-x.
- ten Tusscher, K. H. W. J., Noble, D., Noble, P. J., and Panfilov, A. V. (2004). A model for human ventricular tissue. *Am. J. Physiol. Heart Circ. Physiol.* 286, H1573-89. doi:10.1152/ajpheart.00794.2003.
- Tomaselli, G. F. (2004). What Causes Sudden Death in Heart Failure? *Circ. Res.* 95, 754–763. doi:10.1161/01.RES.0000145047.14691.db.
- Tomaselli, G., and Marbán, E. (1999). Electrophysiological remodeling in hypertrophy and heart failure. *Cardiovasc. Res.* 42, 270–283. doi:10.1016/S0008-6363(99)00017-6.
- Winslow, R. L., Rice, J., Jafri, S., Marban, E., and O'Rourke, B. (1999). Mechanisms of Altered Excitation-Contraction Coupling in Canine Tachycardia-Induced Heart Failure, II: Model Studies. *Circ. Res.* 84, 571–586. doi:10.1161/01.RES.84.5.571.
